# Supplementary material for: Effect of the phase structure on the catalytic activity of MoO3 and potential application for indoor clearance
Source: Royal Society of Chemistry journal article supplement (doi:10.1039/c9tc05241k), 2020-01-01
Supplement: c9tc05241k1.pdf [file c9tc05241k1.pdf]

# **Effect of phase structure on catalytic activity of MoO<sub>3</sub> and potential application for indoor clearance**

Peipei Sun, Fei Teng\*, Zhicheng Yang, Xiaoman Yang, Siyu Zhai, Shuyu Liang,  
Wenhao Gu, Weiyi Hao, Shaoqian Shi

Jiangsu Engineering and Technology Research Center of Environmental Cleaning  
Materials (ECM), Jiangsu Collaborative Innovation Center of Atmospheric  
Environment and Equipment Technology (AEET), Jiangsu Key Laboratory of  
Atmospheric Environment Monitoring and Pollution Control (AEMPC), School of  
Environmental Science and Engineering, Nanjing University of Information Science  
and Technology, Nanjing 100084, P. R. China. E-mail: 001880@nuist.edu.cn.

**Fig.1**

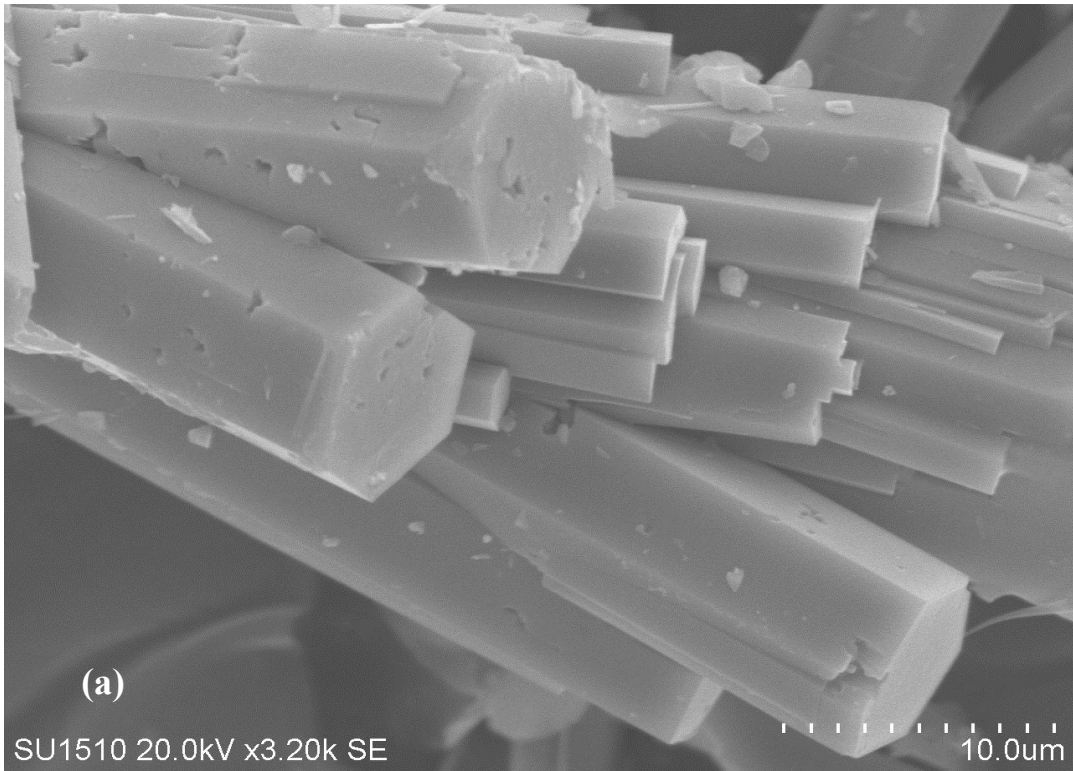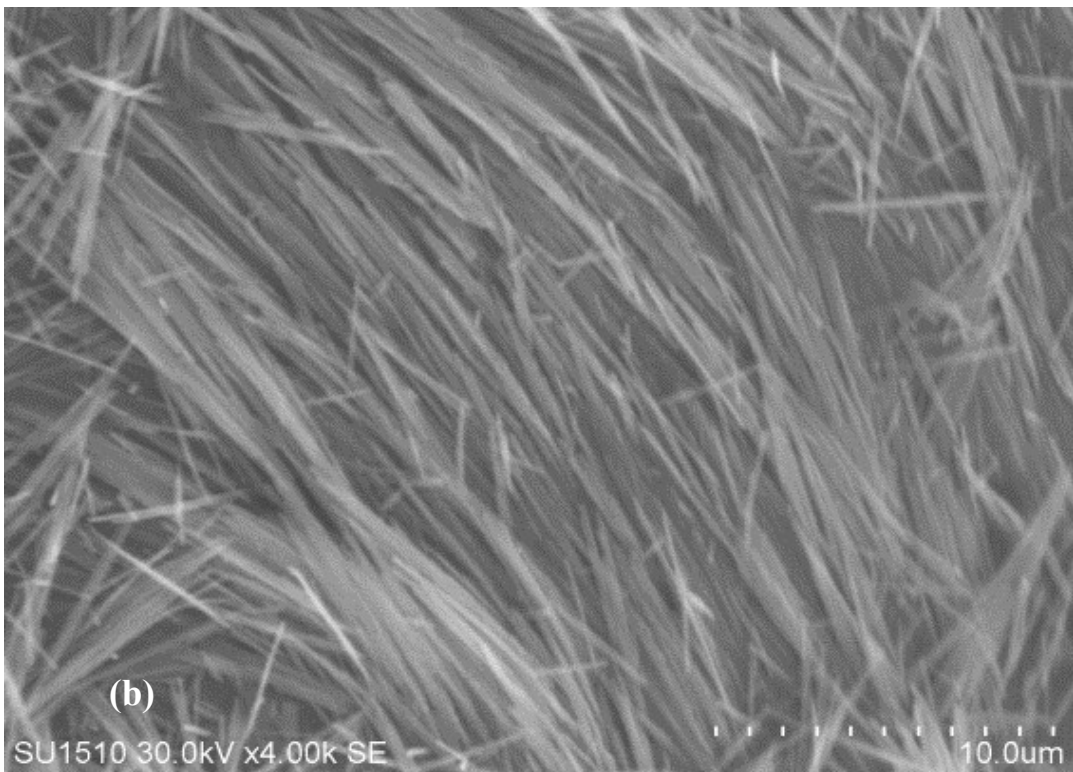

Fig. S1 SEM of samples: (a) h-MoO<sub>3</sub>; (b)  $\alpha$ -MoO<sub>3</sub>

Fig.2

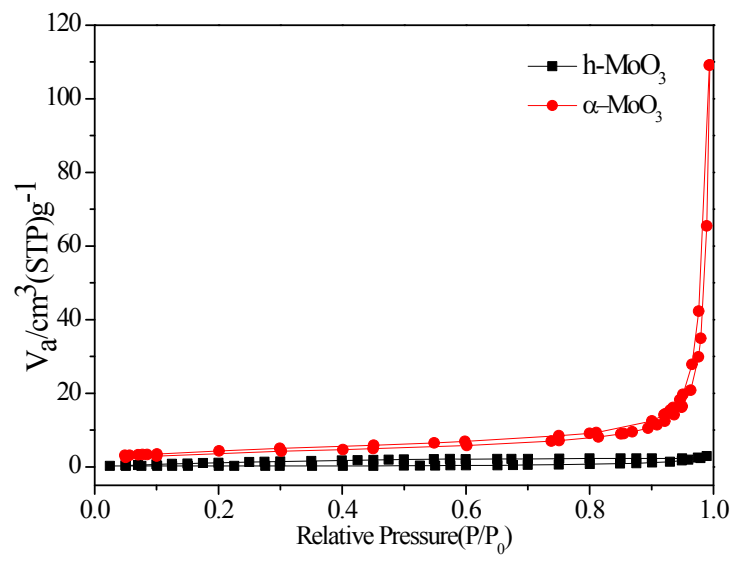

Fig. S2 Nitrogen sorption isotherms of samples

**Fig.3**

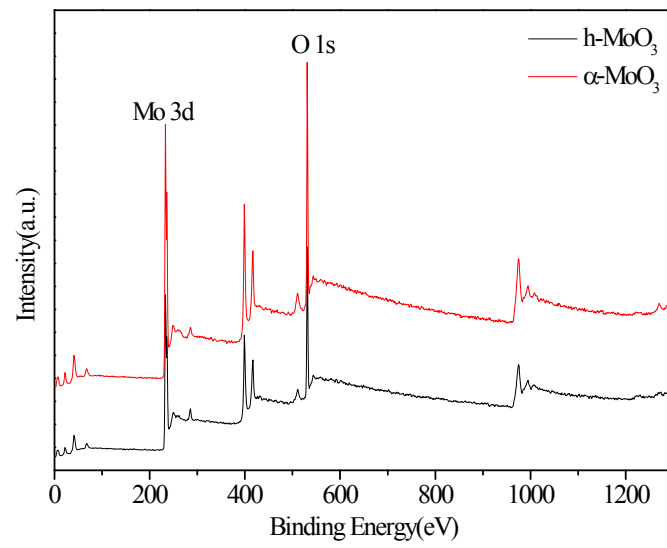

Fig. S3 Full XPS spectra of samples
